# Supplementary material for: Design of Novel Photocatalytic Films for the Protection of Architectural Surfaces via the Incorporation of Green Photocatalysts
Source: MDPI journal article supplement (doi:10.3390/coatings11080934), 2021-08-04
Supplement: s1 [file s1]

# Supplementary Materials: Design of Novel Photocatalytic Films for the Protection of Architectural Surfaces via the Incorporation of Green Photocatalysts

Dimitrios Stefanakis <sup>1</sup>, Themis Krasoudaki <sup>1</sup>, Anastasios-Ioannis Kaditis <sup>1</sup>, Asterios Bakolas <sup>2</sup> and Pagona-Noni Maravelaki <sup>1,\*</sup>

<sup>1</sup> Laboratory of Materials of Cultural Heritage and Modern Building, School of Architecture, Technical University of Crete, Chania 73100, Greece; dimitrischem@hotmail.com (D.S.); themis.krasoudaki@gmail.com (T.K.); anastasiskaditis@yahoo.gr (A.-I.K.)

<sup>2</sup> School of Chemical Engineering, National Technical University of Athens, 15780 Athens, Greece; abakolas@mail.ntua.gr

\* Correspondence: pmaravelaki@isc.tuc.gr

**Table S1.** Mix design of the concrete and lime mortars treated with the proposed nanocomposite FX-C with TiO<sub>2</sub>-Cdots.

| Concrete Composition (%w/w)               |                              |       |
|-------------------------------------------|------------------------------|-------|
| Cement                                    | 9814 CEM II/B-LL 32,5N       | 19.6  |
| Coarse aggregates                         | 9738 Medium NORDIA limestone | 40.2  |
| Fine aggregates                           | 9737 Sand NORDIA limestone   | 40.2  |
| Lime mortar Composition (%w/w)            |                              |       |
| Natural Hydraulic Lime (NHL 3.5)          |                              | 15    |
| Metakaolin (Argical –M1000, Imerys Group) |                              | 10    |
| Carbonaceous sand 0-4 mm                  |                              | 47.81 |
| Quartz sand 0-7 mm                        |                              | 15.94 |
| Coarse-grained carbonaceous sand 2-5 mm   |                              | 11.25 |

**Table S2.** Protective agent uptake on concrete, limestone and lime mortar specimens.

| Specimen    | Protective Agent Uptake (gr/m <sup>2</sup> ) |
|-------------|----------------------------------------------|
| Concrete    | 108.33                                       |
| Limestone   | 75.10                                        |
| Lime mortar | 136.91                                       |

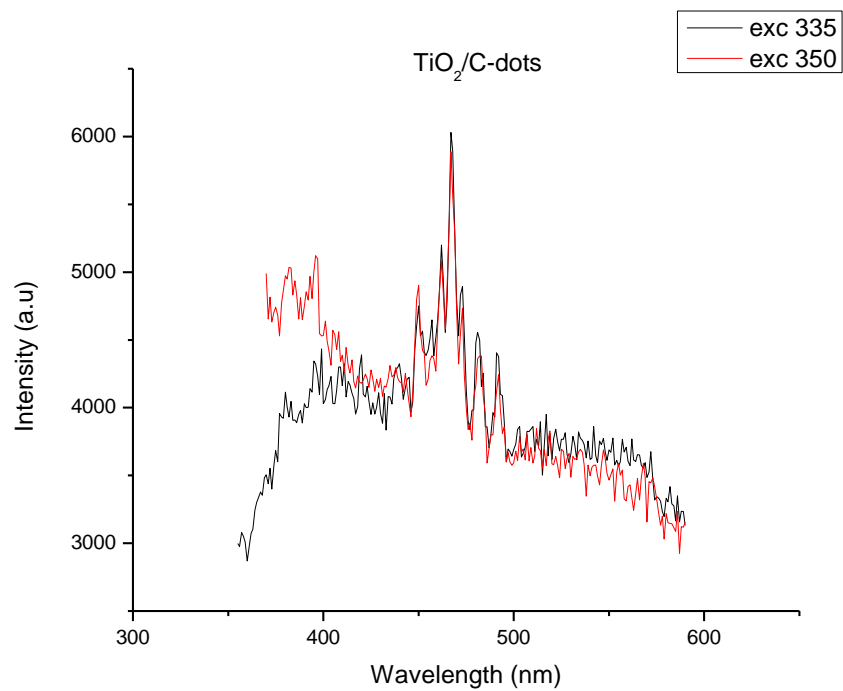

**Figure S1.** Fluorescence spectra of  $\text{TiO}_2/\text{C-dots}$ .

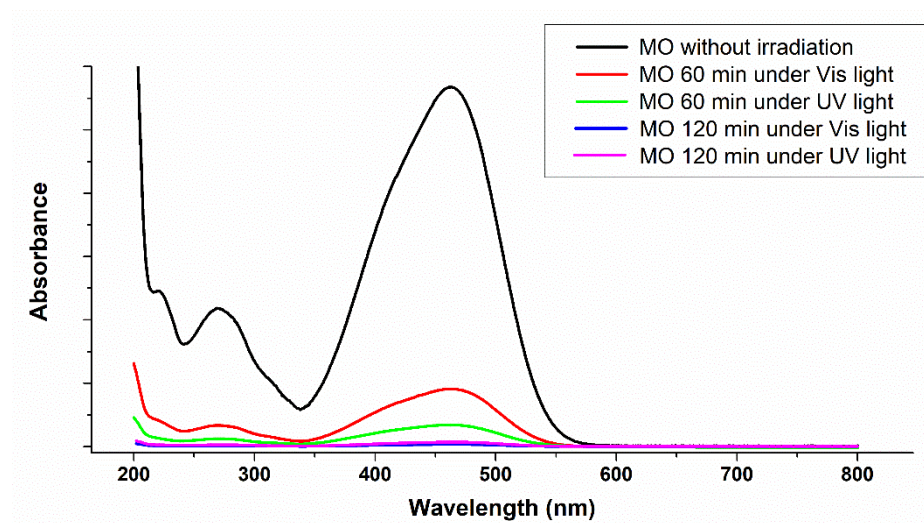

**Figure S2.**  $\text{TiO}_2/\text{C-dots}$ : UV-Vis spectra of MO before (black line) and after 180 min irradiation with UV (green line) and Vis (red line).

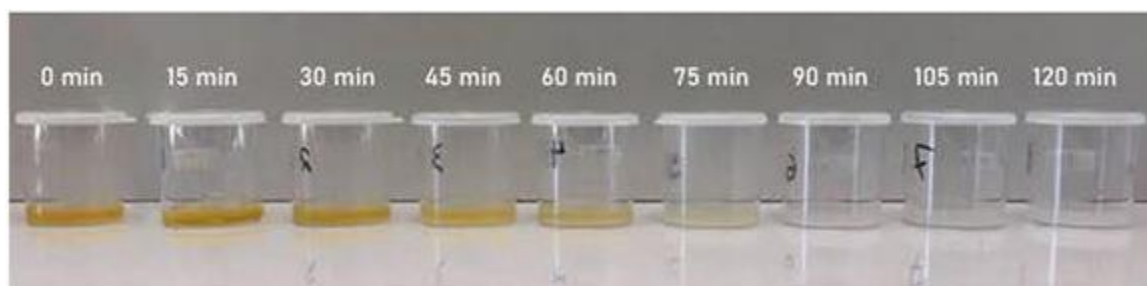

**Figure S3.**  $\text{TiO}_2/\text{C-dots}$ : Macroscopic image of Methylene Orange photodegradation by UV.

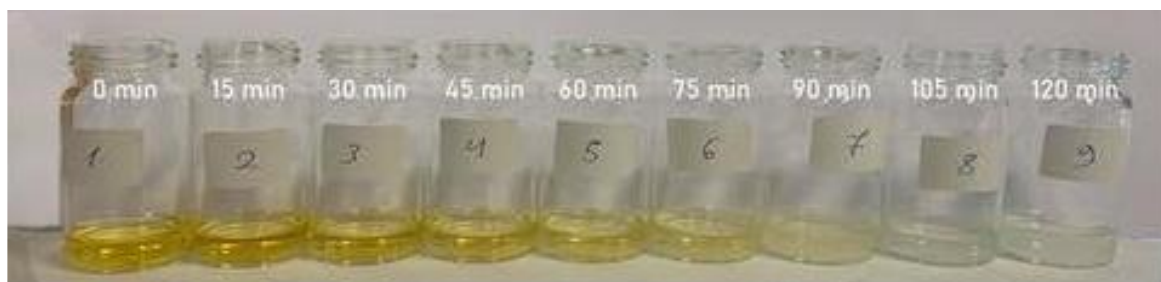

**Figure S4.**  $\text{TiO}_2/\text{C-dots}$ : Macroscopic image of Methylene Orange photodegradation by Vis.

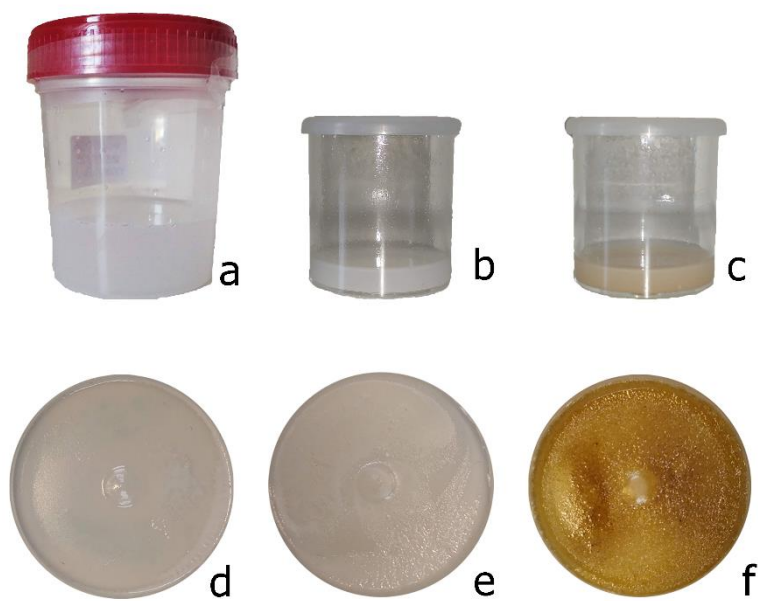

**Figure S5.** FX-C (a,d), FX-C with  $\text{TiO}_2$  (b,e), FX-C with  $\text{TiO}_2/\text{C-dots}$  (c,f) in the form of sol and xerogel, respectively. Xerogels' diameter is about 30 mm.
